# Supplementary material for: Combined Therapy with microRNA-Expressing Salmonella and Irradiation in Melanoma
Source: MDPI journal article supplement (doi:10.3390/microorganisms9112408), 2021-11-22
Supplement: s1 [file s1]

## Supplementary Figure S1.

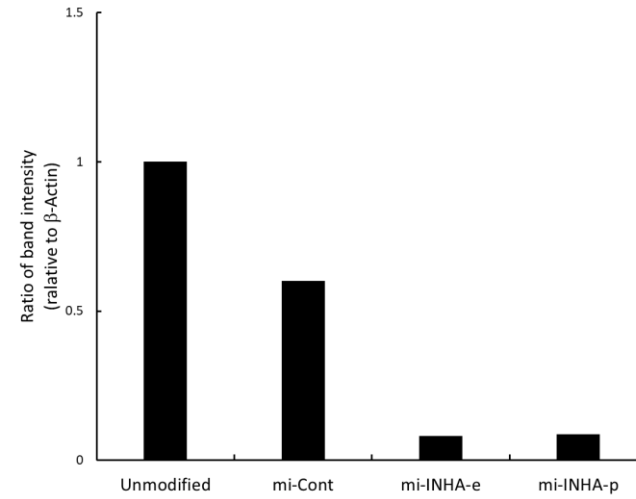

**Supplementary Figure S1.** Suppression of INHA gene by *S. Typhimurium* expressing microRNA against INHA gene. B16F10 cells were infected with unmodified *S. Typhimurium* or genetically modified *S. Typhimurium* expressing negative control mi-RNA or mi-INHA for 48 h. To validate INHA knockdown in cancer cells after infection with recombinant *Salmonella*, the expression of mouse INHA was measured. Western blot normalized to  $\beta$ -actin was added as supplementary material (Supplementary Figure S1). The cell lysates were subjected to Western blot analysis with anti-INHA or anti-actin antibodies.

## Supplementary Figure S2.

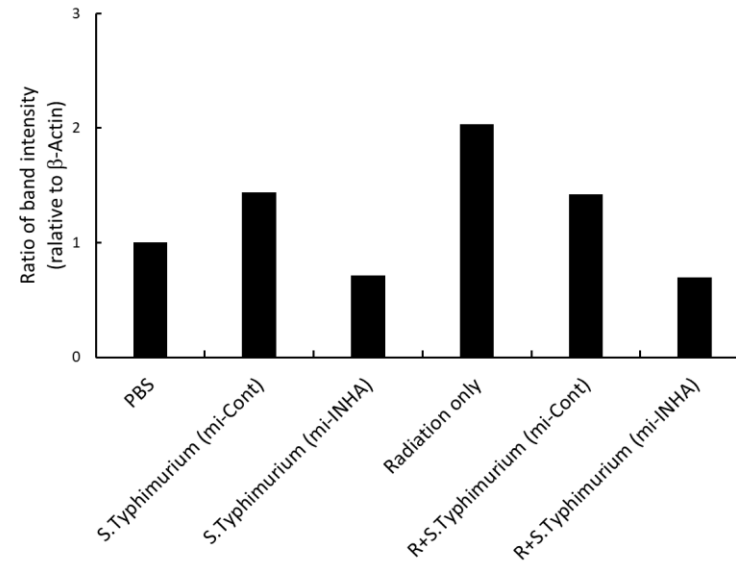

**Figure S2.** Combinatory effects of *S. Typhimurium* expressing mi-INHA and radiation in B16F10 cells. Western blotting was used to detect the expression patterns of Bcl-2, b-actin, and INHA. The blots are representative of three independent experiments. Western blot normalized to  $\beta$ -actin was added as supplementary material (Supplementary Figure S2).

## Supplementary Figure S3.

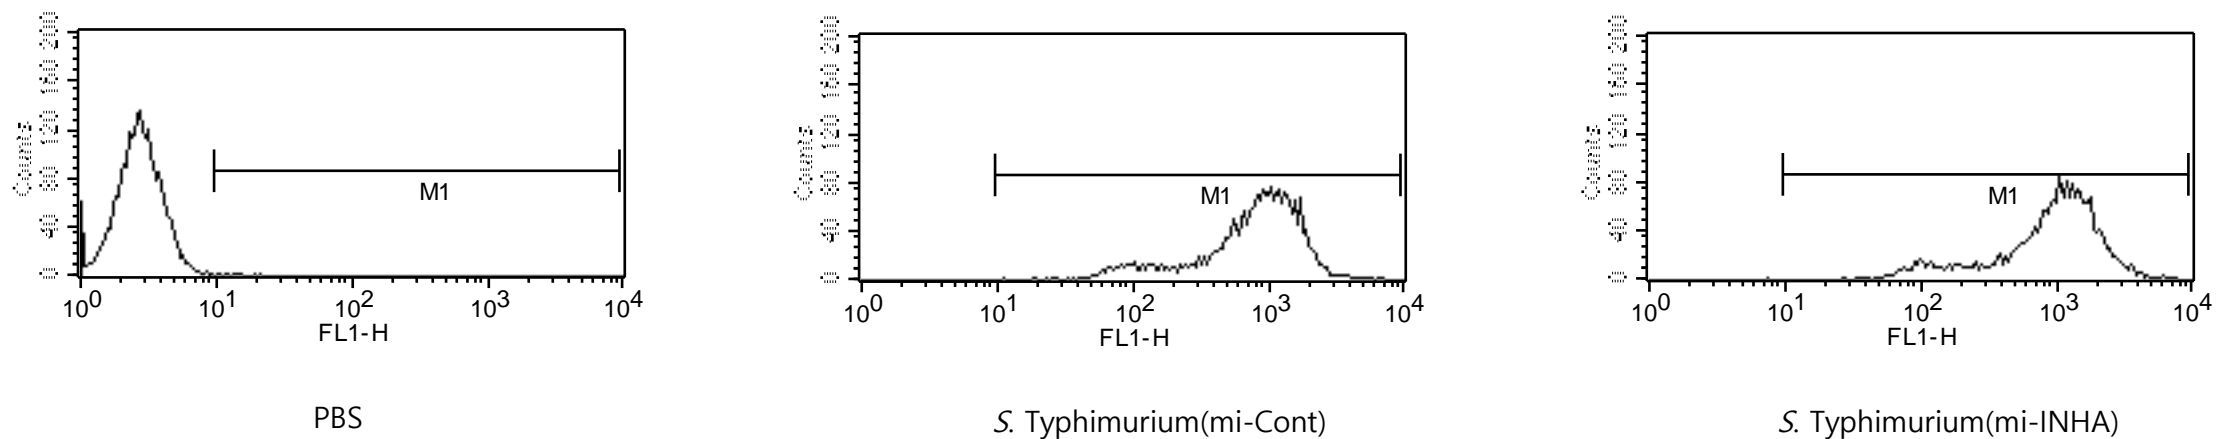

**Figure S3.** Combinatory effects of *S. Typhimurium* expressing mi-INHA and radiation in B16F10 cells. ROS production was measured by FACS analysis in B16F10 cells using 10  $\mu$ M of H<sub>2</sub>DCFDA, which converts to a fluorescent derivative only in the presence of ROS. Flow cytometry histogram data was added as supplementary material (Supplementary Figure S3). Results shown are representative of at least three independent experiments.
